# Supplementary material for: The Value of Vegetation in Nature-Based Solutions: Roles, Challenges, and Utilization in Managing Different Environmental and Climate-Related Problems
Source: MDPI journal article supplement (doi:10.3390/su16083273), 2024-04-14
Supplement: s1 [file s1]

## Supplementary Materials

**Table S1: Vegetation responses to different abiotic and biotic stresses.**

| Type of stress                       | The factors responsible for stress                                                                                                                           | Symptoms –plants reactions to stress                                                                                                                                                                                                                                                                                                                                                                                                                   | Mechanism of survival under stress conditions                                                                                                                                                                                                                                                                                                                                                     | Reference |
|--------------------------------------|--------------------------------------------------------------------------------------------------------------------------------------------------------------|--------------------------------------------------------------------------------------------------------------------------------------------------------------------------------------------------------------------------------------------------------------------------------------------------------------------------------------------------------------------------------------------------------------------------------------------------------|---------------------------------------------------------------------------------------------------------------------------------------------------------------------------------------------------------------------------------------------------------------------------------------------------------------------------------------------------------------------------------------------------|-----------|
| <b>Stress resulting from drought</b> | When the rate of transpiration exceeds the speed at which the roots are absorbing water, or when there is inadequate rainfall and poor soil moisture quality | <ul style="list-style-type: none"> <li>-Decreased development of seedlings and germination of seeds</li> <li>-Reproductive growth is severely affected</li> <li>- Reduction in stomatal conductance.</li> <li>- Reduction in the total dry matter</li> <li>-Limited nutrients interaction</li> <li>-Lower levels of photosynthesis</li> </ul>                                                                                                          | Plants restrict the quantity and size of their leaves, growing the amount of lateral roots and root hair, and closing their stomata.                                                                                                                                                                                                                                                              | [1,2]     |
| <b>Heat stress</b>                   | Caused by high temperature                                                                                                                                   | <ul style="list-style-type: none"> <li>-Decreased plant development and growth</li> <li>-Plant tissue dehydration</li> <li>-Variations in the amount of chlorophyll</li> <li>-Poor establishment of seedlings</li> <li>-Leaf margin drying and scorching effect</li> <li>- Reduced plant growth</li> <li>-Affects pollen development adversely</li> <li>-Variation in the process of photosynthesis</li> <li>-Sterility in spikelet, flower</li> </ul> | <ul style="list-style-type: none"> <li>-Physical modifications inside the plant's body and by the production of signals that alter metabolism;</li> <li>-Maintaining rates of CO<sub>2</sub> uptake and leaf gas exchange;</li> <li>Modifications in the lipid content of membranes, transpirational cooling, or leaf orientation;</li> <li>reducing the absorption of solar radiation</li> </ul> | [1,3–5]   |

|                                                   |                                                                                                                                                                                                                                                                                                                                                                                                                                                                                                                                                    |                                                                                                                                                                                                                                                                                                                                                                                                                     |                                                                                                                                                                                                                                                                                                                                                                                                                     |        |
|---------------------------------------------------|----------------------------------------------------------------------------------------------------------------------------------------------------------------------------------------------------------------------------------------------------------------------------------------------------------------------------------------------------------------------------------------------------------------------------------------------------------------------------------------------------------------------------------------------------|---------------------------------------------------------------------------------------------------------------------------------------------------------------------------------------------------------------------------------------------------------------------------------------------------------------------------------------------------------------------------------------------------------------------|---------------------------------------------------------------------------------------------------------------------------------------------------------------------------------------------------------------------------------------------------------------------------------------------------------------------------------------------------------------------------------------------------------------------|--------|
| <b>Stress due to salinity</b>                     | Caused by Sodium (Na <sup>+</sup> ) and chloride (Cl <sup>-</sup> ) ion accumulation, naturally occurring salinity—as a result of salts building up over decades via means of organic activities in the groundwater or soil, erosion of rocks and lateral rise of brackish groundwater); Salinity stress caused by human actions that alter the hydrologic equilibrium of the soil between water applications (i.e. using low-quality water, deforestation, excessive fertilizer and irrigation dosages, and improper soil preparation procedures) | <ul style="list-style-type: none"> <li>-Impact on reduced chlorophyll content, hypertonic stress, limited aeration, permeability of the soil and water conductivity, and soil health;</li> <li>-Reduced lipid and energy production, protein synthesis, and photosynthesis</li> <li>-Decreased rate of leaf surface expansion; decreased rate of shoot growth and the capacity of plants to absorb water</li> </ul> | <ul style="list-style-type: none"> <li>-Modification of various types of proteins (ion transporters, signal proteins, and energy metabolism-related proteins);</li> <li>-Closure of the stomata, reduction of the CO<sub>2</sub> assimilation; decrease in growth metrics; rise in the loss of electrolytes</li> </ul>                                                                                              | [6,7]  |
| <b>Chemical stress – stress from heavy metals</b> | Resulting from the discharge of sewage and industrial waste; traffic, heavy metal production; natural causes such as fire in forests, particles, and volcanic activity; production of energy                                                                                                                                                                                                                                                                                                                                                       | <ul style="list-style-type: none"> <li>A reduction in the plants' resilience to biotic and abiotic environmental stimuli, as well as modifications to their growth pattern, chemical composition, and antioxidant defense capacity</li> <li>;chlorosis and a reduction in the size of the leaves, reduced tiller count, shortened internodes (2annual2ng), and spikelet sterility, death of shoot apices</li> </ul> | <ul style="list-style-type: none"> <li>-Apoplastic suberin barrier development in the roots; plants trigger a variety of specific processes for metal detoxification; interactions with other organisms such as mycorrhizal fungus that stores metals;</li> <li>-Plants alter the rhizosphere's pH to prevent the accumulation of metal ions; generating a lot of a particular type of root exudate etc.</li> </ul> | [7,8]  |
| <b>Cold stress</b>                                | Depends on the climate and on additional factors                                                                                                                                                                                                                                                                                                                                                                                                                                                                                                   | A number of phenotypic signs, such as decreased leaf growth, withering, and chlorosis (leaf yellowing), which                                                                                                                                                                                                                                                                                                       | Avoidance of low temperature, Plant dormancy, Modifications in morphology, biochemistry, and biophysics; activation of some enzymes connected to                                                                                                                                                                                                                                                                    | [9,10] |

|                                            |                                                                                                                                                      |                                                                                                                              |                                                                                                                                                                                                                                                                                                                                                                                                                             |         |
|--------------------------------------------|------------------------------------------------------------------------------------------------------------------------------------------------------|------------------------------------------------------------------------------------------------------------------------------|-----------------------------------------------------------------------------------------------------------------------------------------------------------------------------------------------------------------------------------------------------------------------------------------------------------------------------------------------------------------------------------------------------------------------------|---------|
|                                            |                                                                                                                                                      | might result in necrosis (death), low germination                                                                            | the metabolism of sugar and the calvin cycle                                                                                                                                                                                                                                                                                                                                                                                |         |
| <b>Stress caused by an excess of water</b> | Caused by a salinity-high soil or drought, when the amount of water available to their roots is limited or when the rate of transpiration increases; | -Decrease in the oxygen diffusion rate in the soil and a build-up of hazardous substances, variations in nutrient absorption | <ul style="list-style-type: none"> <li>-The formation of adventitious Roots, formation of aerenchyma, hypoxia avoidance strategy by increasing the supply of oxygen to the root tissue,</li> <li>-Reduced water absorption and closure of stomata, erosion, denitrification of soils,</li> <li>-Growth occurs in the root-to-shoot ratio, maximizing their cells' and organs' shape, physiology, and metabolism.</li> </ul> | [10,11] |

## References

1. Iqbal, MS.; Singh, AK.; Ansari, MI. Effect of drought stress on crop production. New frontiers in stress management for durable 626 agriculture. **2020**, :35-47. [https://doi.org/10.1007/978-981-15-1322-0\\_3](https://doi.org/10.1007/978-981-15-1322-0_3).
2. Osakabe, Y.; Osakabe, K.; Shinozaki, K.; Tran, LS. Response of plants to water stress. *Front. Plant Sci.*, **2014**, Mar 13;5:86. <https://doi.org/10.3389/fpls.2014.00086>.
3. Husen, A. The Harsh environment and resilient plants: an overview. Harsh Environment and Plant Resilience: Molecular and Functional Aspects, 2021, pp.1-23. [https://doi.org/10.1007/978-3-030-65912-7\\_1](https://doi.org/10.1007/978-3-030-65912-7_1).
4. Sisodia, A.; Singh, AK.; Padhi, M.; Hembrom, R. Flower Crop Response to Biotic and Abiotic Stresses. New Frontiers in Stress Management for Durable Agriculture, **2020**, 477-91. [https://doi.org/10.1007/978-981-15-1322-0\\_25](https://doi.org/10.1007/978-981-15-1322-0_25).
5. Hasanuzzaman, M.; Nahar, K.; Alam, MM.; Roychowdhury R, Fujita M. Physiological, biochemical, and molecular mechanisms of heat stress tolerance in plants. *Int. J. Mol. Sci.*, **2013**, May 3;14(5):9643-84. <https://doi.org/10.1016/B978-0-12-817892-8.00010-6>.
6. Yadav, S.; Atri, N. Impact of salinity stress in crop plants and mitigation strategies. New Frontiers in Stress Management for Durable Agriculture, 2020, 49-63. [https://doi.org/10.1007/978-981-15-1322-0\\_4](https://doi.org/10.1007/978-981-15-1322-0_4).
7. Dubey, R.; Gupta, DK.; Sharma, GK. Chemical stress on plants. New frontiers in stress management for durable agriculture. **2020**, 101-28. [https://doi.org/10.1007/978-981-15-1322-0\\_7](https://doi.org/10.1007/978-981-15-1322-0_7).
8. Satisha, J.; Laxman, RH.; Upreti, KK.; Shivashankara, KS.; Varalakshmi, LR.; Sankaran, M. Mechanisms of abiotic stress tolerance and their management strategies in fruit crops. New Frontiers in Stress Management for Durable Agriculture, **2020**, 579-607. [https://doi.org/10.1007/978-981-15-1322-0\\_29](https://doi.org/10.1007/978-981-15-1322-0_29).
9. Lisar, SY.; Motafakkerazad, R.; Hossain, MM.; Rahman, IM. Water stress in plants: Causes, effects and responses. *Water stress*, **2012**, Jan 25;25(1):33. <https://doi.org/10.5772/39363>.
10. Chen, T.H.; Plant adaptation to low temperature stress. *Can. J. Plant Pathol.*, **1994**, 16(3), pp.231-236. <https://doi.org/10.1080/07060669409500760>.
11. Emamverdian, A.; Ding, Y.; Mokhberdoran, F.; Xie Y. Heavy metal stress and some mechanisms of plant defense response. *Sci. World J.*, 2015. <http://dx.doi.org/10.1155/2015/756120>.
